# Supplementary material
Source: ML conference proceedings conference paper supplement (https://openreview.net/forum?id=BK6Gc10tRy)
Supplement: supplementary_material [file attachment]

## A Metric Details

In this section we provide details for the metrics reported in Table 2.

A few of the similarity measures (SNN and IntDiv) are based on the *Tanimoto coefficient*. In order to compute the Tanimoto coefficient, the molecules are mapped to a vector of fingerprints where each bit in the vector represents the presence (or absence) of a specific fragment.<sup>6</sup> For molecules  $A, B$ , denote their fingerprints by  $m_A$  and  $m_B$  respectively, the Tanimoto coefficient is then calculated as the Jaccard index of the two vectors,

$$J(m_A, m_B) = \frac{|m_A \cap m_B|}{|m_A \cup m_B|} = \frac{|m_A \cap m_B|}{|m_A| + |m_B| - |m_A \cap m_B|}. \quad (\text{A.1})$$

We denote the Tanimoto coefficient of molecules  $A, B$  by  $T(A, B)$ .

**Unique@K** report the fraction of uniquely generated valid SMILES strings amongst the  $K$  molecules generated (validity is determined by the RDKit library). We generate 30,000 molecules for each model and report for  $K = 1,000$  and  $K = 10,000$ . High uniqueness values ensure the models do not collapse into repeatedly producing the same set of molecules.

**Fréchet ChemNet Distance (FCD)** is a metric for evaluating generative models in the chemical context, the method is based on the well established *Fréchet Inception Distance* (FID) metric used to evaluate the performance of generative models in computer vision (Heusel et al., 2017).

Fréchet distance measure the Wasserstein-2 distance (Vaserstein, 1969) from the distributions induced by taking the activations of the last layer of a relevant deep neural net. In the case of FCD, molecule activations are probed from ChemNet (Mayr et al., 2018). Given a set of generated molecules, denote by  $G$  the set of vectors as obtained by the activations of ChemNet, one can calculate the mean and covariance  $\mu_G$  and  $\Sigma_G$ . Similarly, denote  $\mu_R$  and  $\Sigma_R$  the mean and covariance of the set of molecules in the reference set, the FCD is calculated as follows,

$$FCD(G, R) = \|\mu_G - \mu_R\|^2 + Tr\left(\Sigma_G + \Sigma_R - 2(\Sigma_G \Sigma_R)^{1/2}\right). \quad (\text{A.2})$$

where  $Tr(M)$  denotes the trace of the matrix  $M$ . Low FCD values indicate that the generated molecules distribute similarly to the reference set.

**Similarity to Nearest Neighbor (SNN)** is the average of the Tanimoto coefficient of the generated molecule set denoted by  $G$  and their respective nearest neighbor in a reference set of molecules denote by  $R$ . High SNN indicates the generated molecules have similar structures to those in the reference set. This metric is in the range of  $[0, 1]$ .

**Fragment similarity (Frag)** is a fragment similarity measure based on the BRICS fragments (Degen et al., 2008). Denote the set of BRICS fingerprints vectors of the generated molecules by  $G$  and similarly  $R$  for the reference molecules. The fragment similarity is defined as the cosine similarity of the sum vectors,

$$Frag(G, R) = cosine\left(\sum_{g \in G} g, \sum_{r \in R} r\right) \quad (\text{A.3})$$

The Frag measure is in the range of  $[0, 1]$ , values closer to 1 indicate that the generated and reference molecule set have a similar distribution of BRICS fragment.

<sup>6</sup>The molecular fingerprints are obtained from RDKit (Landrum, 2006) and are based on the extended-connectivity fingerprints (Rogers & Hahn, 2010).

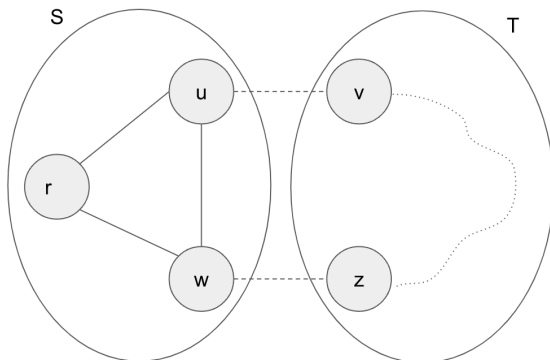

Figure 3: Proof illustration -  $S$  has a cycle and two different trajectories starting from  $u$  and ending with  $w$  ( $urw$  and  $uw(r)$ ). Concatenating with the trajectory from  $z$  to  $v$  we obtain two different DFS trajectories with a shared suffix.

**Scaffold similarity (Scaff)** is similar to the fragment similarity, instead of the BRICS fragment, Scaff is based on mapping molecules to their Bemis–Murcko scaffolds (Bemis & Murcko, 1996).<sup>7</sup> The measure also has a range of  $[0, 1]$ , values closer to 1 indicate that the generated molecule set has a similar distribution of scaffold to the reference set.

**Internal diversity (IntDiv)** is a measure of the chemical diversity within a generated set of molecules  $G$ . This metric indicates

$$IntDiv_p = 1 - \left( \frac{1}{|G|^2} \sum_{A, B \in G} T(A, B)^p \right)^{1/p} \quad (\text{A.4})$$

We report the internal diversity for  $p = 1, 2$ . This measure is in the range  $[0, 1]$ . Low values indicate a lack of diversity in the generated molecules, i.e. that the model outputs molecules with similar fingerprints.

**Filters** is the fraction of generated molecules that pass a certain filtering that has been applied to the training data. The metric is in the range of  $[0, 1]$ , high values indicate that the model has learnt to generate molecules which avoid the structures omitted by the filtering process.

**Novelty** is the fraction of generated molecules that does not appear in the training set. This measure is in the range of  $[0, 1]$  and is an indication of the whether the model overfits the training data.

## B Missing Proofs

In this section we show how to construct distinct DFS trajectories with common end vertex for a 2–edge connected graph conditioned that the graph is not a cycle.

*Proof.* From our assumption that the graph is not a cycle, there exists at least two nodes with degree  $\geq 3$ . Denote by  $C = (S, T)$  a minimal cut of size 2 (such a cut exists from our assumption that the graph is 2-connected). Denote the edges of the minimal cut by  $e_1 = (u, v)$  and  $e_2 = (w, z)$  such that  $u, w \in S$  and  $v, z \in T$ . Next, we claim that at least one of the partitions contains a cycle, otherwise there is a path connecting  $S$  and  $T$  since there are nodes in the graph which have a degree of 3 in the original graph with a path between them. Assume without loss of generality that  $S$  is the partition with a cycle, therefore there are at least 2 different traversals of  $S$  that start with  $u$  and end with  $w$ . There is also a trajectory between

<sup>7</sup>Bemis–Murcko scaffold is the ring structure of a molecule along with the bonds connecting the rings, i.e. the molecule without the side chains.

$z$  and  $v$ . Putting together, there are at least 2 trajectories of the entire graph with a common suffix which is the traversal of  $T$ . Figure 3 illustrates the proof concept.  $\square$
